# Supplementary material for: Comprehensive In Silico Analysis of a Novel Serum Exosome-Derived Competitive Endogenous RNA Network for Constructing a Prognostic Model for Glioblastoma
Source: Front Oncol. 2021 Mar 5;11:553594. doi: 10.3389/fonc.2021.553594 (PMC7973265; doi:10.3389/fonc.2021.553594)
Supplement: Supplementary file 6 [file Table_2.xlsx]

## Sheet: Supplementary Table 2
Supplementary Table 2. GSEA reports for KEGG pathways enriched in the 3 lncRNAs.
lncRNAs	KEGG Terms	SIZE	ES	NES	NOM p-val	FDR q-val
SOX21-AS1	KEGG_RNA_DEGRADATION	59	0.70717	1.84778	0.00383877	0.0685743
	KEGG_SPLICEOSOME	124	0.722589	1.83516	0	0.0109538
	KEGG_UBIQUITIN_MEDIATED_PROTEOLYSIS	133	0.671246	1.82542	0.00198807	0.0864026
	KEGG_PATHWAYS_IN_CANCER	55	0.553259	1.81942	0	0.0681781
	KEGG_CELL_CYCLE	124	0.671826	1.8122	0.00397614	0.0600568
	KEGG_ALPHA_LINOLENIC_ACID_METABOLISM	19	0.601379	1.80317	0.0038835	0.0556027
	KEGG_AMINOACYL_TRNA_BIOSYNTHESIS	41	0.767258	1.79773	0.00197628	0.0516915
	KEGG_RIG_I_LIKE_RECEPTOR_SIGNALING_PATHWAY	70	0.557735	1.79392	0.00197239	0.0483088
	KEGG_NUCLEOTIDE_EXCISION_REPAIR	44	0.704661	1.78047	0.00197239	0.0501094
	KEGG_NOTCH_SIGNALING_PATHWAY	47	0.664527	1.76127	0	0.0595727
	KEGG_SELENOAMINO_ACID_METABOLISM	26	0.688225	1.7597	0	0.0548185
	KEGG_OOCYTE_MEIOSIS	111	0.584691	1.75082	0.00192308	0.0561709
	KEGG_BASE_EXCISION_REPAIR	34	0.708038	1.74789	0.0019305	0.052915
	KEGG_GLYCINE_SERINE_AND_THREONINE_METABOLISM	31	0.592651	1.73468	0.00584795	0.0583749
	KEGG_PYRIMIDINE_METABOLISM	96	0.61442	1.72099	0.00974659	0.0639224
	KEGG_HOMOLOGOUS_RECOMBINATION	28	0.717114	1.72007	0.0039604	0.0605345
	KEGG_APOPTOSIS	86	0.574665	1.71979	0.00571429	0.0572276
	KEGG_PROGESTERONE_MEDIATED_OOCYTE_MATURATION	85	0.593131	1.71493	0.00200401	0.0583023
	KEGG_VALINE_LEUCINE_AND_ISOLEUCINE_BIOSYNTHESIS	11	0.789965	1.70986	0.00195312	0.058292
	KEGG_NEUROTROPHIN_SIGNALING_PATHWAY	126	0.573822	1.70985	0.00585938	0.0553774
	KEGG_ADHERENS_JUNCTION	73	0.605553	1.70883	0.00784314	0.0530097
	KEGG_CHRONIC_MYELOID_LEUKEMIA	73	0.60503	1.70479	0.00769231	0.0515173
	KEGG_PURINE_METABOLISM	155	0.546455	1.69947	0.00407332	0.0521986
	KEGG_ONE_CARBON_POOL_BY_FOLATE	17	0.683363	1.69501	0.00573614	0.0527041
	KEGG_PANCREATIC_CANCER	70	0.577238	1.6898	0.00967118	0.0531485
	KEGG_GLYCEROPHOSPHOLIPID_METABOLISM	76	0.550271	1.68953	0.00814664	0.0512548
	KEGG_COLORECTAL_CANCER	62	0.603825	1.68647	0.00387597	0.0511959
	KEGG_FC_EPSILON_RI_SIGNALING_PATHWAY	79	0.541004	1.68407	0.00984252	0.0516221
	KEGG_ENDOCYTOSIS	178	0.552986	1.67291	0.0211946	0.0556809
	KEGG_RENAL_CELL_CARCINOMA	70	0.585783	1.66653	0.0212766	0.056651
	KEGG_NON_SMALL_CELL_LUNG_CANCER	54	0.581489	1.66252	0.0117878	0.057357
	KEGG_BLADDER_CANCER	41	0.555337	1.66197	0.0173077	0.055981
	KEGG_PROSTATE_CANCER	89	0.562582	1.66097	0.0118577	0.0550276
	KEGG_WNT_SIGNALING_PATHWAY	149	0.531038	1.66052	0.00583658	0.0540503
	KEGG_MISMATCH_REPAIR	23	0.730704	1.65967	0.012	0.0532994
	KEGG_RNA_POLYMERASE	29	0.677235	1.65715	0.0119522	0.0532367
	KEGG_SMALL_CELL_LUNG_CANCER	84	0.560291	1.65322	0.0138614	0.0539735
	KEGG_ENDOMETRIAL_CANCER	52	0.613706	1.65313	0.011976	0.0526157
	KEGG_VEGF_SIGNALING_PATHWAY	75	0.532035	1.64439	0.0060241	0.056013
	KEGG_BASAL_TRANSCRIPTION_FACTORS	35	0.63431	1.64368	0.0158103	0.0552827
	KEGG_ACUTE_MYELOID_LEUKEMIA	57	0.602244	1.64091	0.0218688	0.0551848
	KEGG_LYSINE_DEGRADATION	44	0.629393	1.62988	0.00992064	0.0602751
	KEGG_ERBB_SIGNALING_PATHWAY	87	0.562505	1.62124	0.0257426	0.0640701
	KEGG_REGULATION_OF_AUTOPHAGY	35	0.507871	1.6192	0.0158416	0.0636489
	KEGG_TOLL_LIKE_RECEPTOR_SIGNALING_PATHWAY	101	0.499169	1.6139	0.0313112	0.0655659
	KEGG_T_CELL_RECEPTOR_SIGNALING_PATHWAY	107	0.535755	1.60695	0.0120724	0.0688621
	KEGG_SULFUR_METABOLISM	13	0.655485	1.60256	0.0245399	0.0705223
	KEGG_GLIOMA	65	0.536754	1.59388	0.035503	0.074531
	KEGG_TIGHT_JUNCTION	130	0.497356	1.59277	0.023166	0.0738154
	KEGG_DNA_REPLICATION	36	0.694627	1.59221	0.0439122	0.0728053
	KEGG_TGF_BETA_SIGNALING_PATHWAY	85	0.507844	1.58852	0.023622	0.0734116
	KEGG_MELANOMA	71	0.470826	1.5842	0.0235294	0.0749748
	KEGG_N_GLYCAN_BIOSYNTHESIS	46	0.628799	1.58331	0.0431373	0.0742107
	KEGG_MAPK_SIGNALING_PATHWAY	265	0.49045	1.58286	0.0236686	0.0731471
	KEGG_MTOR_SIGNALING_PATHWAY	52	0.560003	1.58052	0.0316832	0.0729504
	KEGG_P53_SIGNALING_PATHWAY	67	0.517573	1.57493	0.0295858	0.0750558
	KEGG_GLYCOSYLPHOSPHATIDYLINOSITOL_GPI_ANCHOR_BIOSYNTHESIS	25	0.669026	1.57403	0.0159681	0.0745022
	KEGG_CYSTEINE_AND_METHIONINE_METABOLISM	34	0.535164	1.57295	0.0199203	0.0737587
	KEGG_EPITHELIAL_CELL_SIGNALING_IN_HELICOBACTER_PYLORI_INFECTION	67	0.541084	1.57283	0.0283976	0.0726355
	KEGG_LINOLEIC_ACID_METABOLISM	29	0.483181	1.5721	0.0225873	0.0717603
	KEGG_DORSO_VENTRAL_AXIS_FORMATION	24	0.606808	1.57053	0.024	0.0705829
	KEGG_REGULATION_OF_ACTIN_CYTOSKELETON	212	0.479045	1.5676	0.0387597	0.0711756
	KEGG_PROTEASOME	46	0.664638	1.56702	0.0381526	0.0703594
	KEGG_FC_GAMMA_R_MEDIATED_PHAGOCYTOSIS	96	0.538915	1.56458	0.0475248	0.0707573
	KEGG_JAK_STAT_SIGNALING_PATHWAY	151	0.437772	1.56385	0.0383065	0.0689566
	KEGG_NON_HOMOLOGOUS_END_JOINING	13	0.716596	1.56053	0.0142857	0.0696968
	KEGG_HEDGEHOG_SIGNALING_PATHWAY	56	0.491922	1.55755	0.016129	0.0701471
	KEGG_FRUCTOSE_AND_MANNOSE_METABOLISM	34	0.573105	1.55626	0.039604	0.0697415
	KEGG_LONG_TERM_DEPRESSION	70	0.52942	1.54229	0.0293542	0.0761974
	KEGG_GNRH_SIGNALING_PATHWAY	101	0.502609	1.53524	0.0374016	0.0796116
	KEGG_GLYCOSPHINGOLIPID_BIOSYNTHESIS_LACTO_AND_NEOLACTO_SERIES	25	0.555651	1.52902	0.0242424	0.0819555
	KEGG_THYROID_CANCER	29	0.570093	1.5253	0.046	0.0829933
	KEGG_PANTOTHENATE_AND_COA_BIOSYNTHESIS	16	0.585213	1.52462	0.037037	0.0821471
	KEGG_ETHER_LIPID_METABOLISM	33	0.487746	1.515	0.0353635	0.0864263
	KEGG_RIBOFLAVIN_METABOLISM	16	0.568199	1.4901	0.0499002	0.0950025
HOTAIR	KEGG_PATHWAYS_IN_CANCER	116	0.645909	2.12763	0	0.0051978
	KEGG_FOCAL_ADHESION	199	0.632351	2.1117	0	0.0025989
	KEGG_ECM_RECEPTOR_INTERACTION	84	0.705591	2.10323	0	0.00262149
	KEGG_APOPTOSIS	21	0.776063	2.0057	0	0.00921919
	KEGG_JAK_STAT_SIGNALING_PATHWAY	84	0.620726	1.97809	0	0.00961216
	KEGG_GLYCOSAMINOGLYCAN_BIOSYNTHESIS_CHONDROITIN_SULFATE	22	0.758642	1.96167	0	0.0101059
	KEGG_COMPLEMENT_AND_COAGULATION_CASCADES	69	0.619004	1.9417	0.00429185	0.011793
	KEGG_LYSOSOME	119	0.645681	1.92427	0.00608519	0.0121374
	KEGG_GALACTOSE_METABOLISM	26	0.685509	1.9131	0	0.0116389
	KEGG_VIRAL_MYOCARDITIS	68	0.604263	1.89401	0.00842105	0.0135281
	KEGG_LEISHMANIA_INFECTION	70	0.68219	1.89116	0.00854701	0.0130428
	KEGG_CYTOKINE_CYTOKINE_RECEPTOR_INTERACTION	258	0.590087	1.86432	0.0105708	0.0170058
	KEGG_HYPERTROPHIC_CARDIOMYOPATHY_HCM	83	0.569019	1.86295	0	0.016018
	KEGG_N_GLYCAN_BIOSYNTHESIS	46	0.690841	1.86271	0.00417537	0.0151456
	KEGG_ARRHYTHMOGENIC_RIGHT_VENTRICULAR_CARDIOMYOPATHY_ARVC	74	0.572154	1.82849	0.00209644	0.0229282
	KEGG_BLADDER_CANCER	41	0.573044	1.82124	0	0.0236985
	KEGG_PANTOTHENATE_AND_COA_BIOSYNTHESIS	16	0.691493	1.82112	0.0040568	0.0225136
	KEGG_STARCH_AND_SUCROSE_METABOLISM	52	0.52596	1.81895	0	0.0218918
	KEGG_NOD_LIKE_RECEPTOR_SIGNALING_PATHWAY	61	0.627519	1.81829	0.0104603	0.0210347
	KEGG_OTHER_GLYCAN_DEGRADATION	16	0.736031	1.80008	0.0123457	0.0246775
	KEGG_ACUTE_MYELOID_LEUKEMIA	57	0.603528	1.77768	0.0040404	0.0309051
	KEGG_AMINO_SUGAR_AND_NUCLEOTIDE_SUGAR_METABOLISM	44	0.646463	1.75898	0.00423729	0.0367825
	KEGG_P53_SIGNALING_PATHWAY	67	0.555867	1.75775	0.00398406	0.0358753
	KEGG_TOLL_LIKE_RECEPTOR_SIGNALING_PATHWAY	101	0.549303	1.75495	0.0235043	0.035843
	KEGG_GLYCOSAMINOGLYCAN_BIOSYNTHESIS_KERATAN_SULFATE	14	0.723	1.74834	0.010352	0.0372335
	KEGG_REGULATION_OF_ACTIN_CYTOSKELETON	212	0.504797	1.74725	0.00206612	0.0363243
	KEGG_TGF_BETA_SIGNALING_PATHWAY	85	0.532325	1.74409	0.00816326	0.0366848
	KEGG_NICOTINATE_AND_NICOTINAMIDE_METABOLISM	22	0.609971	1.74206	0.00829876	0.0361974
	KEGG_HEMATOPOIETIC_CELL_LINEAGE	85	0.591056	1.73994	0.0191898	0.0359522
	KEGG_GLYCOSPHINGOLIPID_BIOSYNTHESIS_GANGLIO_SERIES	15	0.717214	1.73539	0.00609756	0.0365023
	KEGG_CELL_ADHESION_MOLECULES_CAMS	131	0.52026	1.73175	0.0252632	0.0371128
	KEGG_CHRONIC_MYELOID_LEUKEMIA	73	0.582767	1.7295	0.00413223	0.0368252
	KEGG_GLYCOSPHINGOLIPID_BIOSYNTHESIS_GLOBO_SERIES	14	0.711461	1.72031	0.00860215	0.0383909
	KEGG_DILATED_CARDIOMYOPATHY	90	0.531948	1.71045	0.00833333	0.0411501
	KEGG_PROSTATE_CANCER	89	0.53306	1.70226	0.00616016	0.0437146
	KEGG_COLORECTAL_CANCER	62	0.572023	1.70171	0.00408163	0.0428157
	KEGG_ADHERENS_JUNCTION	73	0.566554	1.6974	0.014433	0.04368
	KEGG_PANCREATIC_CANCER	70	0.544673	1.69608	0.004158	0.0432007
	KEGG_FC_GAMMA_R_MEDIATED_PHAGOCYTOSIS	96	0.535905	1.67367	0.0246407	0.0524074
	KEGG_GLYCOSAMINOGLYCAN_BIOSYNTHESIS_HEPARAN_SULFATE	26	0.630219	1.66861	0.0125786	0.0535169
	KEGG_GLYCOLYSIS_GLUCONEOGENESIS	61	0.515001	1.65153	0.0124481	0.0598149
	KEGG_NATURAL_KILLER_CELL_MEDIATED_CYTOTOXICITY	131	0.487757	1.64165	0.0295983	0.0630809
	KEGG_CHEMOKINE_SIGNALING_PATHWAY	186	0.4815	1.6386	0.0391753	0.0636643
	KEGG_T_CELL_RECEPTOR_SIGNALING_PATHWAY	107	0.519612	1.63431	0.0309278	0.0641217
	KEGG_PATHOGENIC_ESCHERICHIA_COLI_INFECTION	56	0.527228	1.62812	0.0357895	0.0660707
	KEGG_ONE_CARBON_POOL_BY_FOLATE	17	0.624122	1.61695	0.0205761	0.0707604
	KEGG_B_CELL_RECEPTOR_SIGNALING_PATHWAY	74	0.528321	1.61295	0.0448065	0.0715276
	KEGG_RENAL_CELL_CARCINOMA	70	0.527975	1.57272	0.0328542	0.0934064
	KEGG_RENIN_ANGIOTENSIN_SYSTEM	17	0.581947	1.54875	0.0394191	0.10634
	KEGG_SULFUR_METABOLISM	13	0.613412	1.54801	0.0256959	0.104927
	KEGG_EPITHELIAL_CELL_SIGNALING_IN_HELICOBACTER_PYLORI_INFECTION	67	0.49858	1.53836	0.0496894	0.106433
	KEGG_VEGF_SIGNALING_PATHWAY	75	0.47474	1.53783	0.0306122	0.105025
	KEGG_CYSTEINE_AND_METHIONINE_METABOLISM	34	0.493127	1.5343	0.0229167	0.105505
	KEGG_DRUG_METABOLISM_OTHER_ENZYMES	51	0.431098	1.50919	0.0248963	0.119803
	KEGG_FC_EPSILON_RI_SIGNALING_PATHWAY	79	0.460982	1.50007	0.0424242	0.119293
	KEGG_TYROSINE_METABOLISM	42	0.466481	1.49016	0.0336842	0.12011
STEAP3-AS1	KEGG_MAPK_SIGNALING_PATHWAY	74	0.632965	1.88838	0.00212766	0.136089
	KEGG_CALCIUM_SIGNALING_PATHWAY	176	0.60663	1.81952	0.0147679	0.181448
	KEGG_APOPTOSIS	41	0.527772	1.77162	0.00618557	0.148633
	KEGG_ENDOCYTOSIS	158	0.594571	1.74743	0.0333333	0.196806
	KEGG_LONG_TERM_POTENTIATION	69	0.646894	1.74565	0.0359408	0.166242
	KEGG_AMYOTROPHIC_LATERAL_SCLEROSIS_ALS	52	0.606189	1.73582	0.014862	0.157858
	KEGG_BETA_ALANINE_METABOLISM	22	0.628341	1.73396	0.00409836	0.14065
	KEGG_ARGININE_AND_PROLINE_METABOLISM	52	0.543939	1.72656	0.00833333	0.135312
	KEGG_DRUG_METABOLISM_OTHER_ENZYMES	51	0.471975	1.71883	0.00601202	0.131399
	KEGG_GNRH_SIGNALING_PATHWAY	101	0.563866	1.71646	0.0191083	0.122417
	KEGG_VIBRIO_CHOLERAE_INFECTION	54	0.565071	1.70759	0.0142566	0.123304
	KEGG_PPAR_SIGNALING_PATHWAY	69	0.511002	1.68965	0.0102041	0.137621
	KEGG_EPITHELIAL_CELL_SIGNALING_IN_HELICOBACTER_PYLORI_INFECTION	67	0.543144	1.68529	0.00998004	0.132839
	KEGG_GALACTOSE_METABOLISM	26	0.60812	1.67365	0.0204082	0.139248
	KEGG_PRIMARY_BILE_ACID_BIOSYNTHESIS	16	0.639417	1.67228	0.0162272	0.132084
	KEGG_DRUG_METABOLISM_CYTOCHROME_P450	71	0.460488	1.66352	0.00403226	0.135133
	KEGG_TYPE_II_DIABETES_MELLITUS	46	0.591952	1.66332	0.045082	0.121073
	KEGG_DILATED_CARDIOMYOPATHY	90	0.513773	1.65398	0.018595	0.124674
	KEGG_METABOLISM_OF_XENOBIOTICS_BY_CYTOCHROME_P450	69	0.465212	1.64974	0.0102041	0.123077
	KEGG_GLYCEROLIPID_METABOLISM	49	0.528493	1.64582	0.00829876	0.121901
	KEGG_ARRHYTHMOGENIC_RIGHT_VENTRICULAR_CARDIOMYOPATHY_ARVC	74	0.503761	1.63998	0.0297619	0.124166
	KEGG_ALANINE_ASPARTATE_AND_GLUTAMATE_METABOLISM	32	0.547877	1.63028	0.0290456	0.128769
	KEGG_CELL_ADHESION_MOLECULES_CAMS	131	0.499935	1.62947	0.0241449	0.124474
	KEGG_HYPERTROPHIC_CARDIOMYOPATHY_HCM	83	0.492058	1.61283	0.0308642	0.131571
	KEGG_FATTY_ACID_METABOLISM	42	0.538973	1.60994	0.0305499	0.130426
	KEGG_ADIPOCYTOKINE_SIGNALING_PATHWAY	67	0.523263	1.60124	0.0125	0.130396
	KEGG_TIGHT_JUNCTION	130	0.481627	1.599	0.0379747	0.129204
	KEGG_STEROID_HORMONE_BIOSYNTHESIS	55	0.44994	1.59734	0.0104167	0.123026
	KEGG_HISTIDINE_METABOLISM	28	0.55585	1.59615	0.0184805	0.120449
	KEGG_MELANOGENESIS	101	0.507558	1.5879	0.0318471	0.123191
	KEGG_O_GLYCAN_BIOSYNTHESIS	27	0.558792	1.58088	0.0228216	0.126169
	KEGG_GLYCEROPHOSPHOLIPID_METABOLISM	76	0.497304	1.58058	0.0260521	0.123129
	KEGG_GLYCOLYSIS_GLUCONEOGENESIS	61	0.517085	1.58057	0.0416667	0.119972
	KEGG_VASCULAR_SMOOTH_MUSCLE_CONTRACTION	115	0.482017	1.55846	0.0463158	0.132772
	KEGG_ARACHIDONIC_ACID_METABOLISM	58	0.444075	1.55813	0.0140562	0.129892
	KEGG_FRUCTOSE_AND_MANNOSE_METABOLISM	34	0.544515	1.54147	0.0439331	0.13991
	KEGG_RIG_I_LIKE_RECEPTOR_SIGNALING_PATHWAY	70	0.505269	1.5397	0.0292969	0.138799
	KEGG_PHENYLALANINE_METABOLISM	18	0.570179	1.53907	0.042	0.136689
	KEGG_TYROSINE_METABOLISM	42	0.477518	1.53767	0.0242915	0.135292
	KEGG_CYTOSOLIC_DNA_SENSING_PATHWAY	55	0.511601	1.50436	0.0373281	0.140102
	KEGG_VEGF_SIGNALING_PATHWAY	75	0.472871	1.49535	0.0413223	0.139118
	KEGG_ABC_TRANSPORTERS	44	0.468952	1.47704	0.0416667	0.143149
	KEGG_ETHER_LIPID_METABOLISM	33	0.47261	1.46249	0.0480962	0.150972
	KEGG_GLYCOSPHINGOLIPID_BIOSYNTHESIS_LACTO_AND_NEOLACTO_SERIES	25	0.492798	1.43171	0.047817	0.164975
ES, enrichment score; NES, normalized enrichment score; NOM P-val, nominal P value; FDR, false discovery rate.
